# Supplementary material for: Polypeptide gels incorporating the exotic functional aromatic amino acid 4-amino-l-phenylalanine
Source: Royal Society of Chemistry journal article supplement (doi:10.1039/c8py00427g), 2018-01-01
Supplement: c8py00427g1.pdf [file c8py00427g1.pdf]

## Supporting information

### For

# Polypeptide gels incorporating the exotic functional aromatic amino acid 4-amino-L-phenylalanine

*Tatsuo Kaneko*<sup>1,2, ‡\*</sup>, *Mohammad Asif Ali*<sup>1, ‡</sup>, *Ilya Captain*<sup>2</sup>, *Pesach Perlin*<sup>2</sup> and *Timothy J. Deming*<sup>2\*</sup>

- 1) Graduate School of Advanced Science and Technology, Energy and Environment Area, Japan Advanced Institute of Science and Technology (JAIST), 1-1 Asahidai, Nomi, Ishikawa, 923-1292 Japan
- 2) Departments of Bioengineering and Chemistry and Biochemistry, University of California, Los Angeles (UCLA), 420 Westwood Plaza, Los Angeles, 90095-1600, USA.

Corresponding Author

\*e-mail: [kaneko@jaist.ac.jp](mailto:kaneko@jaist.ac.jp), [demingt@seas.ucla.edu](mailto:demingt@seas.ucla.edu)

Author Contributions

‡ Equal contribution as first authors

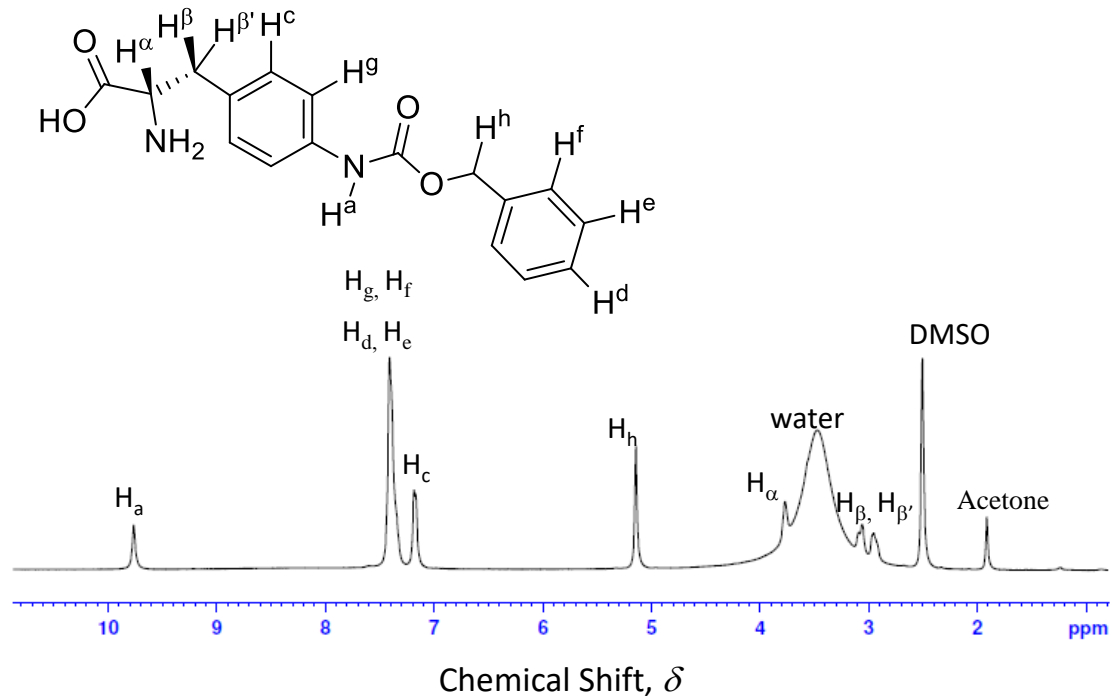

**Figure S1.**  $^1\text{H}$  NMR spectrum (400 MHz,  $\text{DMSO-}d_6$ ) of 4-carbobenzyloxyamino-L-phenylalanine, Cbz-4APhe

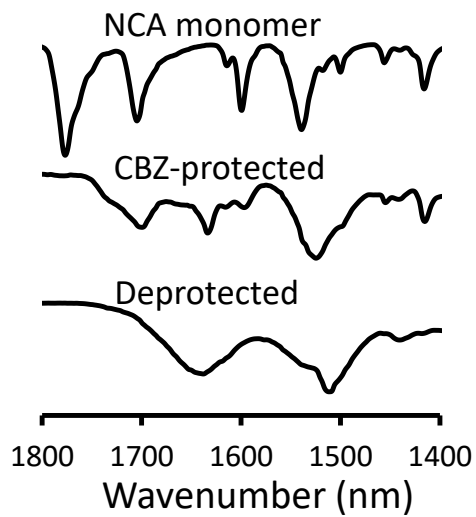

**Figure S2.** FTIR spectra of Cbz-4APhe NCA monomer, poly(4-carbobenzyloxyamino-L-phenylalanine), and deprotected poly(4-amino-L-phenylalanine), P4APhe.

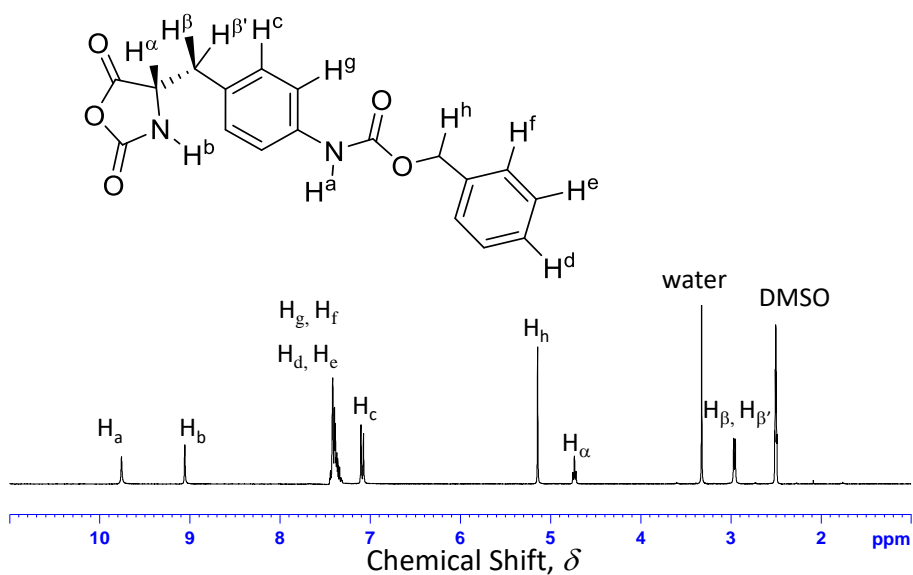

**Figure S3.**  $^1\text{H}$  NMR spectrum (400 MHz, DMSO- $d_6$ ) of Cbz-4APhe NCA monomer

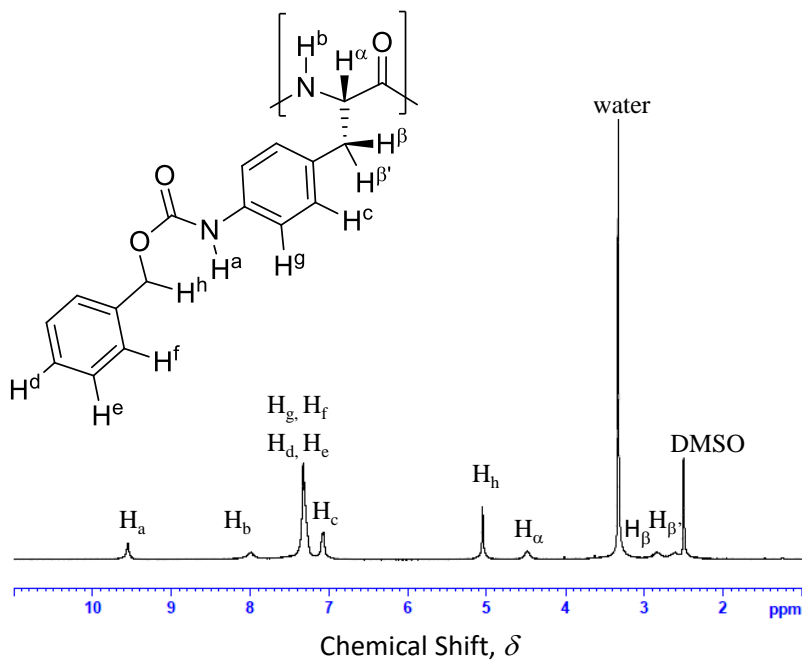

**Figure S4.**  $^1\text{H}$  NMR spectrum (400 MHz, DMSO- $d_6$ ) of poly(4-carbobenzyloxyamino-L-phenylalanine)

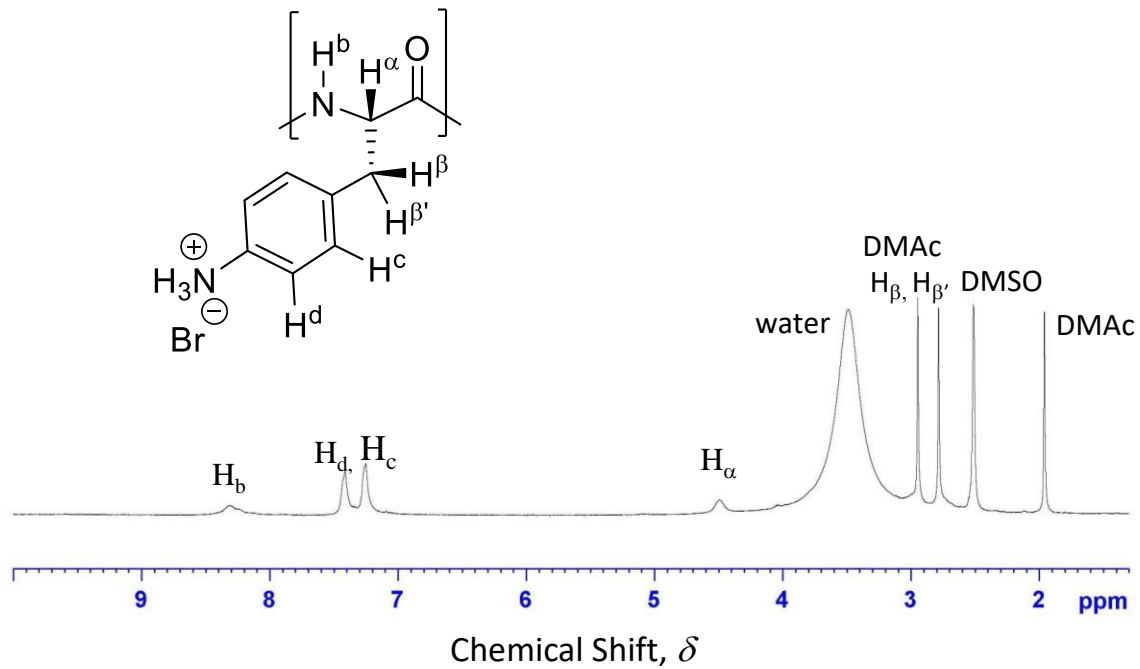

Figure S5.  $^1\text{H}$  NMR spectrum (400 MHz,  $\text{DMSO-}d_6$ ) of poly(4-amino-L-phenylalanine), P4APhe

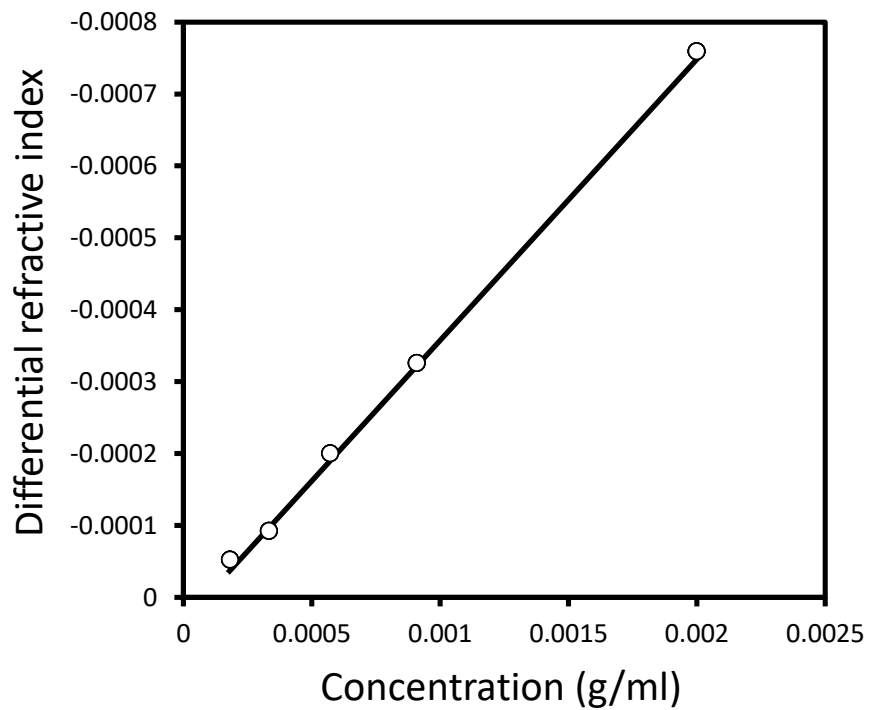

**Figure S6.** Differential refractive index of poly(4-carbobenzyloxyamino-L-phenylalanine) solutions as a function of polymer concentration. The value of  $dn/dc$  (0.392 ml/g) was determined from the slope of the fit line. Solvent = 1.0M LiBr in DMF.

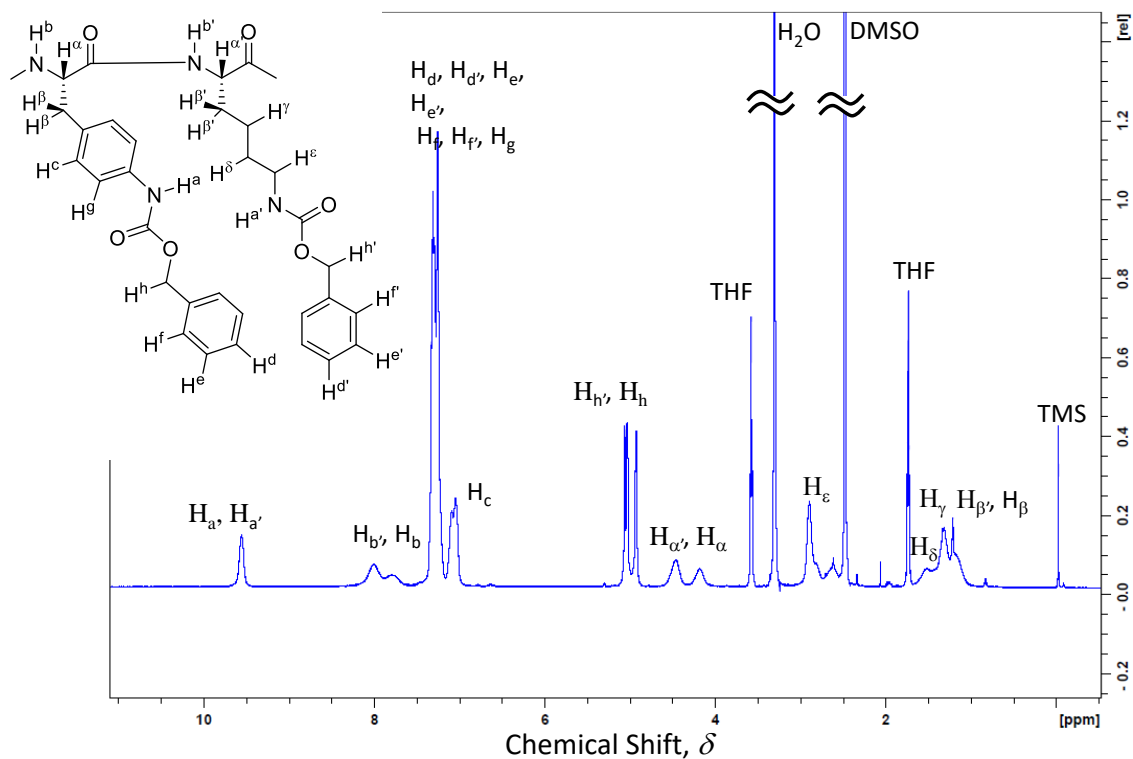

**Figure S7.** Representative  $^1\text{H}$  NMR spectrum (400 MHz,  $\text{DMSO-}d_6$ ) of the copolymer of Cbz-4APhe and Cbz-Lysine. Copolymer composition was determined from the ratio of the integrals for the  $\alpha$  and  $\alpha'$  resonances

**Table S1.** Molecular weight, composition, and qualitative firmness data for copolymers of Cbz-4APhe and Cbz-Lysine. Total initial NCA concentration = 80 mg/ml.

|                       |      |        |      |      |      |
|-----------------------|------|--------|------|------|------|
| % Lysine in feed      | 80   | 60     | 40   | 20   | 0    |
| % Lysine in copolymer | 80.6 | 59.6   | 41.5 | 23.1 | 0    |
| $M_w \times 10^{-4}$  | 5.4  | 6.1    | 5.1  | 5.4  | 5.3  |
| Film firmness         | Soft | —————> |      |      | Hard |

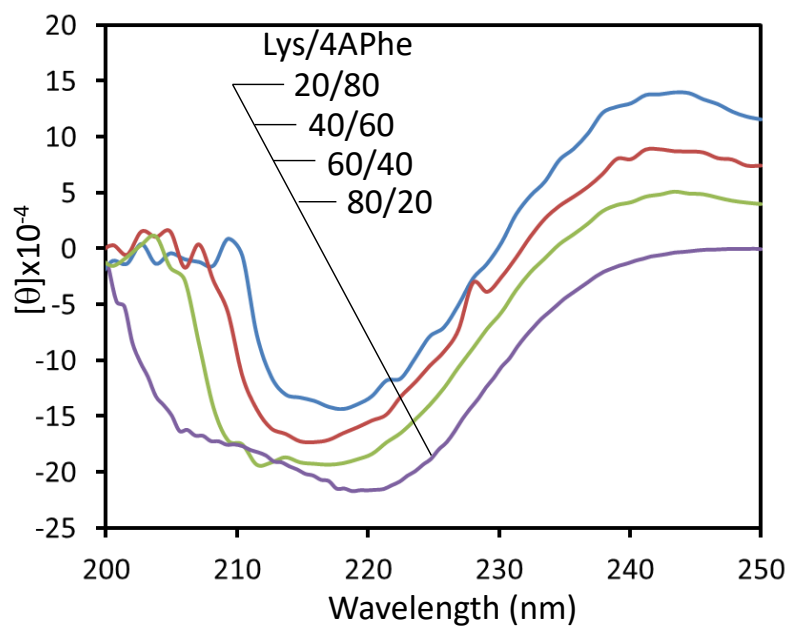

**Figure S8.** CD spectra of statistical copolymers of 4APhe and L-lysine with a range of comonomer compositions, measured at pH = 2.0. Copolymer concentrations = 2.5 mg/ml.
